# Supplementary material for: Antioxidant Activity and Photosynthesis Efficiency in Melissa officinalis Subjected to Heavy Metals Stress
Source: MDPI journal article supplement (doi:10.3390/molecules28062642), 2023-03-14
Supplement: s1 [file s1]

# Antioxidant activity and photosynthesis efficiency in *Melissa Officinalis* subjected to heavy metals stress

Dorota Adamczyk-Szabela<sup>a\*</sup>, Ewa Chreścijańska<sup>a</sup>, Piotr Zielenkiewicz<sup>b</sup>, Wojciech M. Wolf<sup>a</sup>

<sup>1</sup>Technical University of Lodz, Institute of General and Ecological Chemistry, Faculty of Chemistry, Zeromskiego 116, 90-924 Lodz, Poland

<sup>2</sup> Institute of Biochemistry and Biophysics Polish Academy of Sciences Department of Bioinformatics, Pawińskiego 5a; 02-106 Warsaw, Poland

**Corresponding author:** Adamczyk-Szabela Dorota<sup>a\*</sup>, e-mail: [dorota.adamczyk@p.lodz.pl](mailto:dorota.adamczyk@p.lodz.pl)

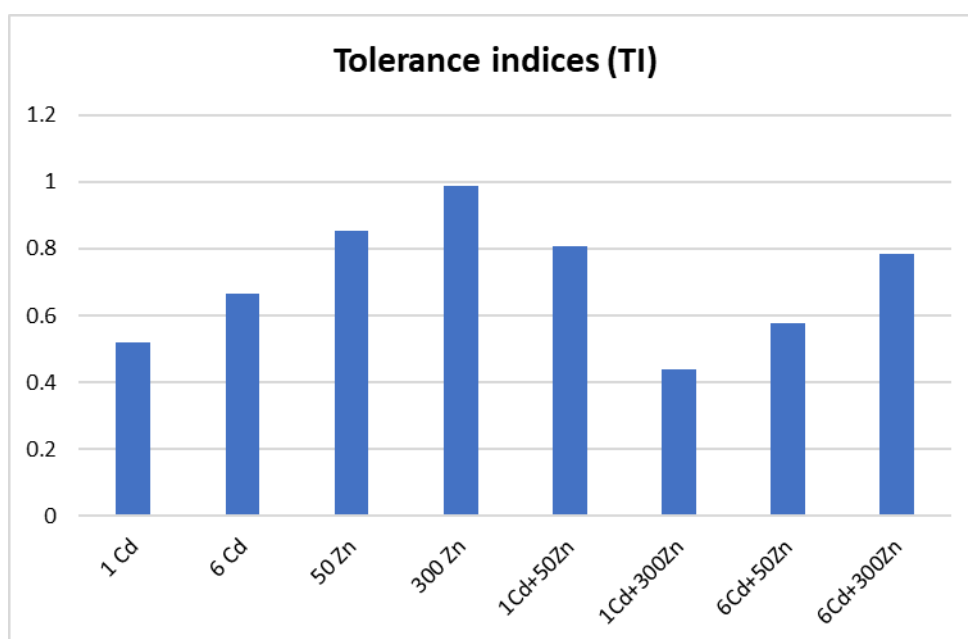

**Figure S1.** Tolerance indices (TI) calculated for all Cd and Zn treatments

**Table S1.** Potentials, currents, partial and total activities as determined by CV (a) and DPV

(b) methods

(a)

| No | Samples    | Peak number | Potential (V) | Current ( $\mu\text{A}$ ) | Partial activity ( $\mu\text{A/V}$ ) | Total activity ( $\mu\text{A/V}$ ) | Order in terms of activity |
|----|------------|-------------|---------------|---------------------------|--------------------------------------|------------------------------------|----------------------------|
| 1  | Control    | 1           | 1.26          | 25.0                      | 20.0                                 | <b>71.0</b>                        | <b>9</b>                   |
|    |            | 2           | 1.91          | 97.0                      | 51.0                                 |                                    |                            |
| 2  | 1Cd        | 1           | 1.19          | 22.0                      | 19.0                                 | <b>80.0</b>                        | <b>8</b>                   |
|    |            | 2           | 1.94          | 118                       | 61.0                                 |                                    |                            |
| 3  | 6Cd        | 1           | 1.91          | 198                       | 104                                  | <b>104</b>                         | <b>6</b>                   |
| 4  | 50Zn       | 1           | 1.15          | 21.0                      | 18.0                                 | <b>95.0</b>                        | <b>7</b>                   |
|    |            | 2           | 1.67          | 55.0                      | 33.0                                 |                                    |                            |
|    |            | 3           | 1.96          | 86.0                      | 44.0                                 |                                    |                            |
| 5  | 300Zn      | 1           | 0.98          | 17.0                      | 17.0                                 | <b>119</b>                         | <b>5</b>                   |
|    |            | 2           | 1.59          | 72.0                      | 45.0                                 |                                    |                            |
|    |            | 3           | 1.96          | 111                       | 57.0                                 |                                    |                            |
| 6  | 1Cd+50Zn   | 1           | 0.90          | 17.0                      | 19.0                                 | <b>123</b>                         | <b>4</b>                   |
|    |            | 2           | 1.41          | 64.0                      | 46.0                                 |                                    |                            |
|    |            | 3           | 1.91          | 110                       | 58.0                                 |                                    |                            |
| 7  | 1Cd+ 300Zn | 1           | 0.95          | 14.0                      | 15.0                                 | <b>124</b>                         | <b>3</b>                   |
|    |            | 2           | 1.56          | 68.0                      | 43.0                                 |                                    |                            |
|    |            | 3           | 1.88          | 123                       | 66.0                                 |                                    |                            |
| 8  | 6Cd+50Zn   | 1           | 1.22          | 24.0                      | 19.0                                 | <b>154</b>                         | <b>2</b>                   |
|    |            | 2           | 1.64          | 81.0                      | 50.0                                 |                                    |                            |
|    |            | 3           | 1.91          | 161                       | 85.0                                 |                                    |                            |
| 9  | 6Cd+ 300Zn | 1           | 0.28          | 14.0                      | 49.0                                 | <b>251</b>                         | <b>1</b>                   |
|    |            | 2           | 0.68          | 23.0                      | 34.0                                 |                                    |                            |
|    |            | 3           | 1.66          | 113                       | 68.0                                 |                                    |                            |
|    |            | 4           | 1.95          | 196                       | 100                                  |                                    |                            |

(b)

| No | Samples   | Peak number | Potential (V) | Current ( $\mu$ A) | Activity ( $\mu$ A/V) | Total activity ( $\mu$ A/V) | Order in terms of activity |
|----|-----------|-------------|---------------|--------------------|-----------------------|-----------------------------|----------------------------|
| 1  | Control   | 1           | 0.79          | 2.42               | 3.06                  | <b>6.39</b>                 | <b>9</b>                   |
|    |           | 2           | 1.96          | 6.51               | 3.33                  |                             |                            |
| 2  | 1Cd       | 1           | 0.87          | 2.61               | 2.99                  | <b>6.63</b>                 | <b>8</b>                   |
|    |           | 2           | 1.99          | 7.22               | 3.64                  |                             |                            |
| 3  | 6Cd       | 1           | 0.24          | 2.20               | 9.36                  | <b>43.3</b>                 | <b>2</b>                   |
|    |           | 2           | 0.39          | 2.37               | 6.14                  |                             |                            |
|    |           | 3           | 0.60          | 3.67               | 6.09                  |                             |                            |
|    |           | 4           | 1.84          | 39.9               | 21.7                  |                             |                            |
| 4  | 50Zn      | 1           | 0.84          | 2.72               | 3.24                  | <b>11.0</b>                 | <b>7</b>                   |
|    |           | 2           | 1.66          | 5.15               | 3.11                  |                             |                            |
|    |           | 3           | 1.88          | 8.74               | 4.65                  |                             |                            |
| 5  | 300Zn     | 1           | 0.87          | 3.24               | 3.75                  | <b>11.4</b>                 | <b>6</b>                   |
|    |           | 2           | 1.57          | 5.07               | 3.24                  |                             |                            |
|    |           | 3           | 1.85          | 8.22               | 4.45                  |                             |                            |
| 6  | 1Cd+50Zn  | 1           | 0.90          | 3.71               | 4.15                  | <b>11.5</b>                 | <b>5</b>                   |
|    |           | 2           | 1.62          | 4.99               | 3.08                  |                             |                            |
|    |           | 3           | 1.82          | 7.68               | 4.23                  |                             |                            |
| 7  | 1Cd+300Zn | 1           | 0.92          | 2.54               | 2.78                  | <b>18.8</b>                 | <b>4</b>                   |
|    |           | 2           | 1.84          | 29.4               | 16.0                  |                             |                            |
| 8  | 6Cd+50Zn  | 1           | 1.54          | 4.10               | 2.66                  | <b>21.5</b>                 | <b>3</b>                   |
|    |           |             | 1.90          | 35.8               | 18.9                  |                             |                            |
| 9  | 6Cd+300Zn | 1           | 0.23          | 10.7               | 45.9                  | <b>78.0</b>                 | <b>1</b>                   |
|    |           | 2           | 0.46          | 3.67               | 7.99                  |                             |                            |
|    |           | 3           | 0.60          | 4.88               | 8.20                  |                             |                            |
|    |           | 4           | 1.64          | 9.47               | 5.78                  |                             |                            |
|    |           | 5           | 1.84          | 18.7               | 10.2                  |                             |                            |

**Table S2.** Metals content in the certified reference material (p = 0.95, n = 6).

| <b>Metal</b>     | <b>Certified value</b><br><b>µg/g</b> | <b>Found</b><br><b>µg/g</b> | <b>Recovery</b><br><b>%</b> |
|------------------|---------------------------------------|-----------------------------|-----------------------------|
| <b>Cadmium</b>   | 0.199 ± 0.015                         | 0.195 ± 0.010               | 98                          |
| <b>Zinc</b>      | 33.5 ± 2.1                            | 34.2 ± 1.6                  | 102                         |
| <b>Copper</b>    | 7.77 ± 0.53                           | 7.65 ± 0.49                 | 98                          |
| <b>Manganese</b> | 191 ± 12                              | 184 ± 10                    | 96                          |
